# Supplementary material
Source: PubMed Central journal article supplement (PMC3192257)

## **SUPPLEMENTAL FIGURE LEGENDS**

**Figure S1. Controls for protein interaction experiments.** Protein pull down assays using the indicated beads and the indicated amounts of His-Hag, GST-CsrA, GST, and FliW proteins. Gels were stained with Coomassie blue. “Input” indicates the starting amount of protein in the assays, “supernatant” indicates the proteins that failed to bind to the beads, and “pellet” indicates the proteins that remained bound to the beads following a series of washes. A) FliW was not retained on the GSH-Sepharose beads when the beads were loaded with GST alone. B) FliW was not retained on untreated GSH-Sepharose beads. Note that a small fraction of the His-Hag protein was retained on untreated GSH-Sepharose beads. C) FliW was poorly retained on untreated Nickel-NTA agarose beads. A large fraction of the GST-CsrA protein alone was retained on untreated Nickel-NTA agarose beads for unknown reasons and this combination of protein and beads was not used in Fig 2.

**Figure S2. Phylogenetic tree from figure 6 reproduced at higher magnification.**

### Supplemental Table S1: Plasmids

| Plasmid  | Genotype                                                   |                               |
|----------|------------------------------------------------------------|-------------------------------|
| pCSB9    | $P_{T7}$ -CsrA-H <sub>6</sub> amp                          | (Yakhnin et al., 2007)        |
| pDP42    | amyE::P <sub>hag</sub> <sup>translational</sup> -lacZ spec |                               |
| pDG780   | kan amp                                                    | (Guérout-Fleury et al., 1995) |
| pDG1515  | tet amp                                                    | (Guérout-Fleury et al., 1995) |
| pDG1728  | amyE::lacZ spec amp                                        | (Guérout-Fleury et al., 1996) |
| pDR111   | amyE::P <sub>hyspank</sub> spec amp                        | (Ben-Yehuda et al., 2003)     |
| pDR183   | lacA::mls amp                                              | (Doan et al., 2005)           |
| pJP4     | $P_{T7}$ -His <sub>6</sub> -Hag amp                        |                               |
| pJP87    | $\Omega\Delta$ fliW mls amp                                |                               |
| pKB43    | $P_{T7}$ -His <sub>6</sub> -SUMO-FliG amp                  |                               |
| pKB142   | lacA::P <sub>hag</sub> -hag <sup>T209C</sup> mls           |                               |
| pLC108   | amyE::P <sub>hyspank</sub> -fliW spec                      |                               |
| pLC109   | amyE::P <sub>hyspank</sub> -csrA spec                      |                               |
| pMiniMAD | ori <sup>BsTs</sup> mls                                    | (Patrick and Kearns, 2008)    |
| pSG35    | $\Omega\Delta$ csrA mls amp                                |                               |
| pSG36    | $\Omega\Delta$ fliWcsrA mls amp                            |                               |
| pSM6     | $P_{T7}$ -GST-CsrA amp                                     |                               |
| pSM12    | $P_{T7}$ -His <sub>6</sub> -SUMO-FliW amp                  |                               |
| pTB146   | $P_{T7}$ -His <sub>6</sub> -SUMO amp                       | (Bendezu et al., 2009)        |

**Supplemental Table S2: Primers**

| Primer | Sequence                                                 |
|--------|----------------------------------------------------------|
| 131    | gcaggatccaagaagaacaaatcattcttttgaaag                     |
| 132    | ttcggtcgacgtggttaattctcattgtttgtcct                      |
| 140    | aggagatgcagaaatcataaatgcatt                              |
| 141    | gaacaacctgcaccattgcaagaattgattgatttcataggattcctct        |
| 142    | ttgatcctttttataacaggaattcaatatgattaattttataaaaagcaataaaa |
| 143    | tcagaaatataattaacgtttcagct                               |
| 663    | aggaggtagcagaattaaccacaatattgcagcgc                      |
| 664    | ctcctgctagcggcaacgccaaggtcttttataaaa                     |
| 848    | ctcctggatcctgaggaatgattaggagatagaaattt                   |
| 882    | aggaggctctccggtatggcgagacgtgatcaagataag                  |
| 883    | ctcctctcgagtgtggagaaatagatgattctgttta                    |
| 1541   | aggaggtagcccgaagaatcacccgaaaagtaa                        |
| 1542   | ctcctgcatgcaatcgcttctgtttttccgcat                        |
| 1543   | aggaggtagcaggagtagatgctgattttatcgcgaaaata                |
| 1544   | ctcctgcatccggattgtctctgattttgtaatac                      |
| 1565   | cagttgaaggatcgcagatg                                     |
| 1871   | aggaggaattcaaagcgggcagaatgtattgaaatg                     |
| 1872   | ctcctgacaccttcgatgaatgatcattgttcacg                      |
| 1875   | aggaggaattcaacaacgacgcctgccagctaa                        |
| 1876   | ctcctgacgactattttccgataaaaactagcatga                     |
| 1877   | aggaggtagactccgattatcctcacaaaaaagtg                      |
| 1878   | ctcctggatcctacgagactcagcagctgtcaag                       |
| 1905   | aggaggatcccttcgatgaatgatcattgttcacg                      |
| 1906   | ctcctggatccaagcatccgattggaggagaatcat                     |
| 1907   | aggaggtagactgttacgtcaagatcattaactgaat                    |
| 2093   | aggaggaattcgattatgcatagtgttcaaggaaaaat                   |
| 2140   | aggaggatccatgctagttttatcgcgaaaataaac                     |
| 2141   | ctcctgaattctcactttttgtgaggataatgcgg                      |
| 2230   | aggaggctctcaggtatgatcattcacaagtagtacc                    |
| 2231   | ctcctctgaggcaatcacttttacttcaatc                          |
| 2704   | aggaggatccttaacaacgacgcctgccagct                         |
| 2707   | ctcctggatcctacgagactcagcagctgtcaag                       |
| 2708   | caatcgccctatagtgagtcgtaactagcatgattctcctccaatcg          |
| 2709   | ccagctttgtcccttagtgagtcgcattatcctcacaaaaaag              |

**Supplemental Table S3:  $\beta$ -galactosidase specific activities for Fig. 2C.**

| Genotype                 | <i>amyE::P<sub>hag</sub><sup>transcriptional</sup>-lacZ</i><br>specific activity in MU | <i>amyE::P<sub>hag</sub><sup>translational</sup>-lacZ</i><br>specific activity in MU |
|--------------------------|----------------------------------------------------------------------------------------|--------------------------------------------------------------------------------------|
| Wild type                | 1048 $\pm$ 60 (DS793)                                                                  | 7739 $\pm$ 610 (DS278)                                                               |
| $\Delta$ <i>fliW</i>     | 2564 $\pm$ 281 (DS8325)                                                                | 316 $\pm$ 9 (DS7598)                                                                 |
| $\Delta$ <i>fliWcsrA</i> | 808 $\pm$ 68 (DS8324)                                                                  | 7617 $\pm$ 982 (DS7597)                                                              |
| $\Delta$ <i>csrA</i>     | 772 $\pm$ 46 (DS8323)                                                                  | 6235 $\pm$ 321 (DS7596)                                                              |

**Supplemental Table S4:  $\beta$ -galactosidase specific activities for Fig 6.**

| Genotype                         | <i>amyE::P<sub>hag</sub><sup>transcriptional</sup>-lacZ</i><br>specific activity in MU | <i>amyE::P<sub>hag</sub><sup>translational</sup>-lacZ</i><br>specific activity in MU |
|----------------------------------|----------------------------------------------------------------------------------------|--------------------------------------------------------------------------------------|
| Wild type                        | 1048 ± 60 (DS793)                                                                      | 17027 ± 3686 (DS278)                                                                 |
| <i>flgM::tet</i>                 | 1877 ± 602 (DS8345)                                                                    | 8714 ± 877 (DS8340)                                                                  |
| <i>csrA::kan</i>                 | 875 ± 38 (DS8341)                                                                      | 17123 ± 1965 (DS8336)                                                                |
| <i>flgM::tet csrA::kan</i>       | 1123 ± 54 (DS8342)                                                                     | 21158 ± 2362 (DS8337)                                                                |
| <i>flgM::tet Δhag</i>            | 936 ± 138 (DS8443)                                                                     | 10404 ± 1614 (DS8442)                                                                |
| <i>ΔflhA</i>                     | 170 ± 11 (DS6784)                                                                      | 139 ± 15 (DS8143)                                                                    |
| <i>ΔflhA flgM::tet</i>           | 1543 ± 195 (DS8299)                                                                    | 1098 ± 291 (DS8298)                                                                  |
| <i>ΔflhA csrA::kan</i>           | 139 ± 33 (DS8373)                                                                      | 1520 ± 94 (DS8371)                                                                   |
| <i>ΔflhA flgM::tet csrA::kan</i> | 1036 ± 86 (DS8297)                                                                     | 18208 ± 2811 (DS8296)                                                                |
| <i>ΔflhA flgM::tet Δhag</i>      | 740 ± 146 (DS8433)                                                                     | 8355 ± 697 (DS8434)                                                                  |
| <i>ΔflgE</i>                     | 114 ± 22 (DS5823)                                                                      | 112 ± 6 (DS7625)                                                                     |
| <i>ΔflgE flgM::tet</i>           | 954 ± 84 (DS8806)                                                                      | 726 ± 127 (DS8927)                                                                   |
| <i>ΔflgE csrA::kan</i>           | 119 ± 33 (DS8343)                                                                      | 880 ± 81 (DS8338)                                                                    |
| <i>ΔflgE flgM::tet csrA::kan</i> | 788 ± 21 (DS8924)                                                                      | 6065 ± 765 (DS8928)                                                                  |
| <i>ΔflgE flgM::tet Δhag</i>      | 830 ± 61 (DS8435)                                                                      | 8012 ± 695 (DS8436)                                                                  |

## SUPPLEMENTAL REFERENCES

Bendezu, F.O., Hale, C.A., Bernhardt, T.G., de Boer, P.A. (2009) RodZ (YfgA) is required for proper assembly of the MreB actin cytoskeleton and cell shape in *E. coli*. *EMBO J* **28**:193–204.

Ben-Yehuda, S., Rudner, D.Z., and Losick, R. (2003) RacA, a bacterial protein that anchors chromosomes to the cell poles. *Science* **299**: 532-536.

Doan, T., Marquis, K.A., and Rudner, D.Z. (2005) Subcellular localization of a sporulation membrane protein is achieved through a network of interactions along and across the septum. *Mol Microbiol* **55**: 1767-1781.

Guérout-Fleury, A.M., Frandsen, N., and Stragier, P. (1996) Plasmids for ectopic integration in *Bacillus subtilis*. *Gene* **180**: 57-61.

Guérout-Fleury, A.M., Shazand, K., Frandsen, N., and Stragier, P. (1995) Antibiotic-resistance cassettes for *Bacillus subtilis*. *Gene* **167**: 335-336.

Patrick, J.E., and Kearns, D.B. (2008) MinJ (YvjD) is a topological determinant of cell division in *Bacillus subtilis*. *Mol Microbiol* **70**: 1166-1179.

Yakhnin, H., Pandit, P., Petty, T.J., Baker, C.S., Romeo, T., and Babitzke, P. (2007) CsrA of *Bacillus subtilis* regulates translation initiation of the gene encoding the flagellin protein (hag) by blocking ribosome binding. *Mol Microbiol* **64**: 1605-1620.

Figure S1

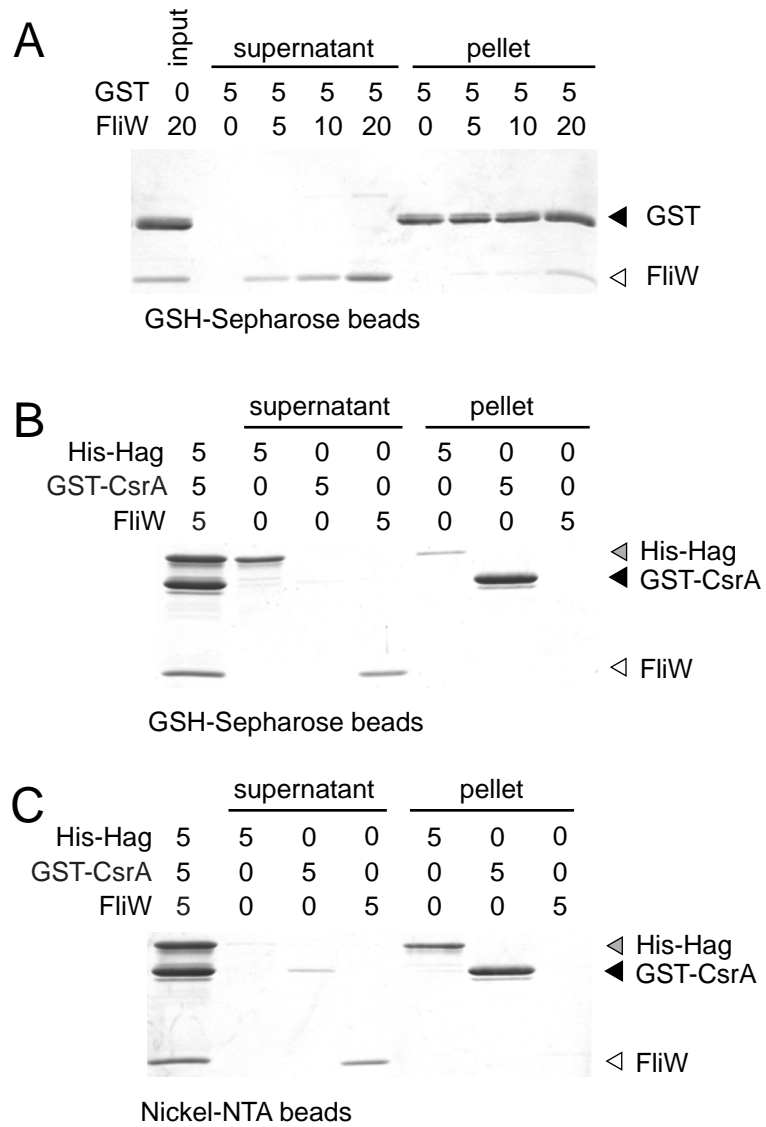

Supplement: NIHMS325104-supplement-Supp_Figure_S1-S2_Table_S1-S4.pdf [file NIHMS325104-supplement-Supp_Figure_S1-S2_Table_S1-S4.pdf]
